# Supplementary material for: BIAM switch assay coupled to mass spectrometry identifies novel redox targets of NADPH oxidase 4
Source: PubMed Central journal article supplement — Redox Biol. 2019 Jan 29;21:101125. doi: 10.1016/j.redox.2019.101125 (PMC6360804; doi:10.1016/j.redox.2019.101125), 2019-01-29
Supplement: mmc1.pdf [file mmc1.pdf]

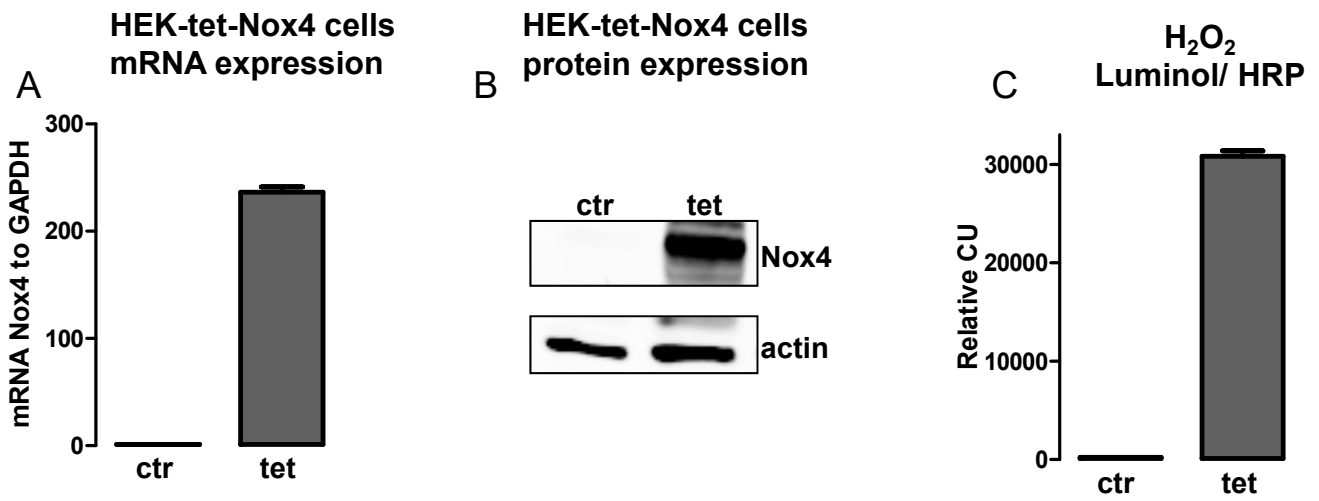

**S1: Characterisation of tetracycline induced Hek-tet-Nox4 cells (tet) and non-induced Hek-tet-Nox4 cells (ctr).**

**A** Analysis of Nox4 mRNA expression relative to housekeeping gene GAPDH. N=3

**B** Representative Western blot for NOX4 expression in tetracycline induced Hek-tet-Nox4 cells (tet) and in non-induced Hek-tet-Nox4 cells (ctr).

**C** ROS measurements assessed by chemiluminescence with Luminol (100µM) / HRP (1U/ml). n=3

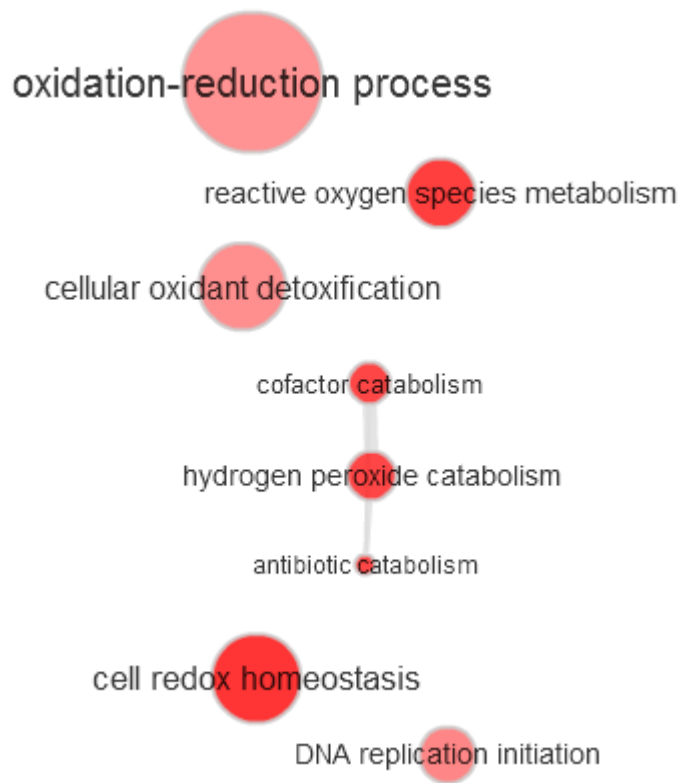

**S2: Nox5 oxidized proteins cluster in different functional processes.**

**A Nox4 mRNA expression**

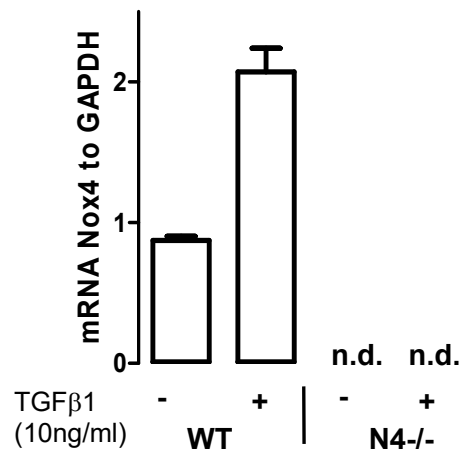

**B Nox4 protein expression**

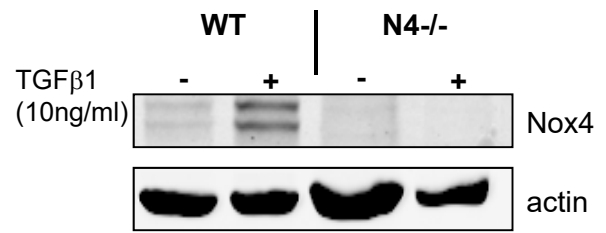

**C H<sub>2</sub>O<sub>2</sub> Luminol/ HRP**

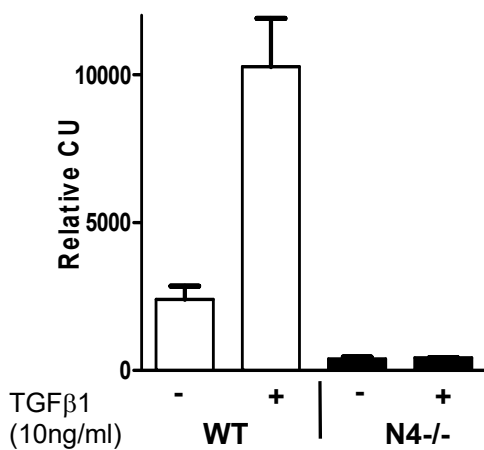

**D Peroxiredoxin oxidation**

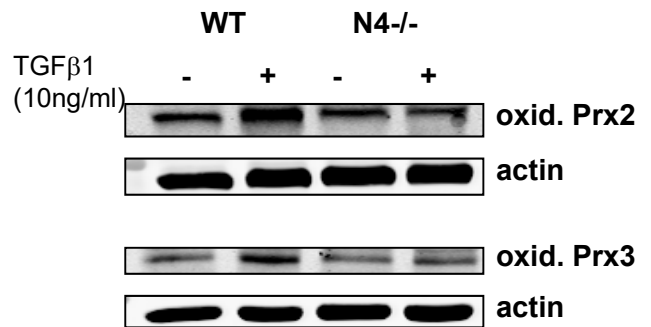

**S3: Characterisation and Redox-western of primary murine podocytes from WT and Nox4<sup>-/-</sup> mice treated with TGFβ1 (24h, 10ng/ml)**

**A** Analysis of Nox4 mRNA expression relative to housekeeping gene GAPDH. N=3

**B** Representative Western blot for NOX4 expression in primary murine podocytes.

**C** ROS measurements assessed by chemiluminescence with Luminol (100μM) / HRP (1U/ml).

**D** Redox-Western for oxidised forms of Prx2, Prx3. Cells were blocked with NEM (100mM), washed with PBS- NEM (100mM). Cells were scraped in alkylation buffer (40mM Hepes, 50 mM NaCl, 1mM EGTA, Inhibitors, Catalase, 100mM NEM) and 1% CHAPS for solubilization.

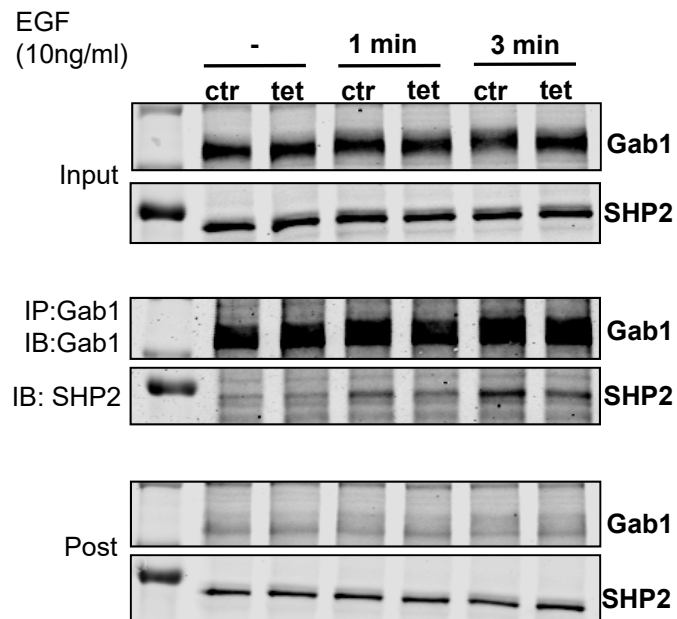

**S4: Co-IP of Gab1 and SHP2 (PTPN11) in tetracycline induced Hek-tet-Nox4 cells (tet) and non-induced Hek-tet-Nox4 cells (ctr) treated with EGF (10ng/ml).**

Hek-tet-Nox4 cells were induced with tetracycline (tet) or not (ctr) and treated with EGF (10ng/ml) for the indicated time. Cells were lysed and Co-IP was performed with 800µg protein lysate.
